# Supplementary figures and images for: Antiproliferative and Antimicrobial Potentials of a Lectin from Aplysia kurodai (Sea Hare) Eggs
Source: MDPI journal article supplement (doi:10.3390/md19070394), 2021-07-14

Supplemental figures

Suppl. Figure S1. Identification of N-terminal amino acid sequence of AKL-40

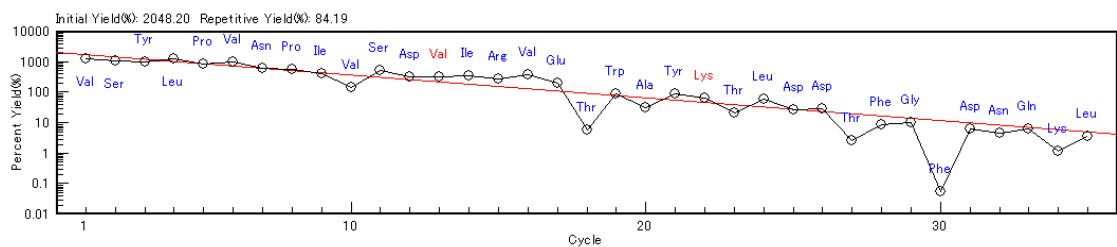

Supplement: s1 [file s1]
